# Supplementary material
Source: publisher figshare collection journal article supplement (https://acs.figshare.com/ndownloader/files/4683595)
Supplement: Supplementary file 1 [file 4683595]

**Supporting Information**

**for**

**Mechanism involved in the evolution of physically irreversible fouling in microfiltration and ultrafiltration membranes used for drinking water treatment**

Hiroshi Yamamura, Katsuki Kimura*, Yoshimasa Watanabe

Division of Built Environment, Graduate School of Engineering, Hokkaido University

N13W8, Kita-ku, Sapporo 060-8628, Japan

**3 Pages, 4 Tables and no graph**

*Authors to whom correspondence should be addressed.
K. Kimura: telephone: +81 (11) 706-6271; Fax: +81 (11) 706-6271; email: kkatsu@eng.hokudai.ac.jp

**Table S1.** Operating conditions of the membrane units.

|  | PVDF | PE | PAN |
| --- | --- | --- | --- |
| Permeate flux (m3/m2/d) | 0.65 | 0.65 | 0.65 |
| Backwashing flux (m3/m2/d) | 0.98 | 0.98 | 0.98 |
| Pore size (MWCO) | 0.1 µm | 0.1 µm | 100,000 Da |
| Surface area | 0.69 m2 | 1.5 m2 | 12.0 m2 |

**Table S2.** Average quality of the feed water and permeates a.

|  | Feed water | PVDF | PE | PAN |
| --- | --- | --- | --- | --- |
| Turbidity b (TU) | 16.2 (25.6) | ND | ND | ND |
| DOC b (mg/L) | 1.4 (0.7) | 1.2 (0.7) | 1.2 (0.7) | 1.0 (0.4) |
| UV254 b (1/cm) | 0.10 (0.05) | 0.08 (0.05) | 0.08 (0.05) | 0.07 (0.05) |
| SUVA (1/m/mg/L) | 7.1 | 6.7 | 6.7 | 7.0 |
| Total Al c (mg/L) | 0.21 (0.27) | 0.041 (0.05) | 0.039 (0.05) | 0.053 (0.06) |
| Dissolved Al c (mg/L) | 0.046 (0.025) |  |  |  |
| Total Ca c (mg/L) | 11.8 (1.8) | 11.3 (1.9) | 11.5 (1.9) | 11.3 (2.3) |
| Dissolved Ca c (mg/L) | 11.8 (2.0) |  |  |  |
| Total Mn c (mg/L) | 0.081 (0.03) | 0.061 (0.02) | 0.056 (0.02) | 0.054 (0.03) |
| Dissolved Mn c (mg/L) | 0.061 (0.03) |  |  |  |
| Total Fe c (mg/L) | 0.69 (0.07) | 0.033 (0.002) | 0.036 (0.002) | 0.027 (0.016) |
| Dissolved Fe c (mg/L) | 0.17 (0.07) |  |  |  |

a Values in parentheses are standard deviations. b n=34. c n=24.

**Table S3.** Concentrations of organic and inorganic substances desorbed with HCl (pH 2) and NaOH (pH 12) solutions.

|  |  | DOC | SUVA | Al | Ca | Mn | Fe |
| --- | --- | --- | --- | --- | --- | --- | --- |
|  |  | mg/m2 | 1/m/mg/L | mg/m2 | mg/m2 | mg/m2 | mg/m2 |
| PVDF | NaOH | 135 | 4.8 | 0.29 | 0.92 | 0.02 | 0.44 |
|  | HCl | 73 |  | 1.21 | 5.11 | 2.52 | 11.09 |
| PE | NaOH | 6 | 4.9 | 0.08 | 0.03 | ND | 0.09 |
|  | HCl | 7 |  | 0.19 | 0.39 | 0.27 | 1.78 |
| PAN | NaOH | 99 | 4.6 | 1.46 | 4.24 | ND | 4.41 |
|  | HCl | 9 |  | 0.94 | 4.83 | 0.22 | 4.28 |

**Table S4.** Zeta potentials of new and fouled membranes a.

|  | PVDF | PE | PAN |
| --- | --- | --- | --- |
| New membrane | -2 mV | -11 mV | -11 mV |
| Fouled membrane | 0 mV | -6 mV | -6 mV |

a Measurements were carried out by using a zeta potential meter (ELS-8000, Otsuka Electronics, Osaka, Japan) at pH 7.0 and 5 mM KCl.
